# Supplementary material for: Double-strand DNA cleavage by copper complexes of 2,2′-dipyridyl with guanidinium/ammonium pendants
Source: Royal Society of Chemistry journal article supplement (doi:10.1039/b801549j), 2008-01-01
Supplement: b801549j.pdf [file b801549j.pdf]

Supporting information for Submission to *Dalton Trans.*

## Double-strand DNA cleavage by copper complexes of 2,2'-dipyridyl with guanidinium/ammonium pendants

Juan He,<sup>a</sup> Ping Hu,<sup>a</sup> Yu-Jia Wang,<sup>a</sup> Ming-Liang Tong,<sup>a</sup> Hongzhe Sun,<sup>b</sup>  
Zong-Wan Mao<sup>a,\*</sup> and Liang-Nian Ji<sup>a</sup>

<sup>a</sup>MOE Key Laboratory of Bioinorganic and Synthetic Chemistry, School of Chemistry and Chemical Engineering, Sun Yat-Sen University, Guangzhou 510275, China.

E-mail: cesmzw@mail.sysu.edu.cn; Fax: (+86) 20 84112245

<sup>b</sup>Department of Chemistry, the University of Hong Kong, Pokfulam Road, Hong Kong, China.

### Contents:

**Fig. S1** <sup>1</sup>H NMR spectrum of L<sup>1</sup>.

**Fig. S2** ESI-MS spectrum of L<sup>1</sup>.

**Fig. S3** *T<sub>m</sub>* curves of 100 μM CT DNA in 20 mM pH 8.0 HEPES buffer, 0.1 M NaClO<sub>4</sub>, in each graph containing no Cu complex(■), 10 μM of **1** (a), **2** (b) and **3** (c) (●), 20 μM of **1** (a), **2** (b) and **3** (c) (▲).

**Fig. S4** Agarose gel electrophoresis and corresponding time course plots showing cleavage of pBR322 DNA by complex **1** and **2** (60-300 μM) in 20 mM pH 7.2 HEPES buffer at 37 °C. In plans, lane C means DNA control. In graphs, symbol ■ indicates the experimental data for the SC forms. The lines connecting them are single exponential fits.

**Table S1** *k<sub>obs</sub>* for the cleavage of pBR322 DNA by different concentrations of complexes.

**Fig. S5** Agarose gel showing cleavage of 38  $\mu\text{M}$  pBR322 DNA incubated with 150  $\mu\text{M}$  of compounds in 20 mM HEPES buffer, pH 7.2 at 37  $^{\circ}\text{C}$  for 1h. Lane C: DNA control, Lane 1: DNA + **L**<sup>1</sup>, Lane 2: DNA + **L**<sup>2</sup>, Lane 3: DNA +  $\text{Cu}(\text{ClO}_4)_2$ , Lane 4: DNA + **1**, Lane 5: DNA + **2**.

**Fig. S6** Agarose gel showing cleavage of 38  $\mu\text{M}$  pBR322 DNA incubated with 150  $\mu\text{M}$  of complex in 20 mM HEPES buffer, pH 7.2 at 37  $^{\circ}\text{C}$  for 1h for **1** and **2**. Lane C: DNA control, Lane 1: DNA + **1**, Lanes 2-4: DNA + **1** +100U/mL, 500U/mL, 1,000U/mL Catalase, Lane 5: DNA + **2**, Lanes 6-8: DNA + **2** +100U/mL, 500U/mL, 1,000U/mL Catalase.

**Fig. S7** Kinetics for the cleavage of plasmid pBR322 DNA by **3** (150, 300, 500, 1000  $\mu\text{M}$ ) in 20 mM HEPES buffer, pH 7.2 at 37  $^{\circ}\text{C}$ . The samples were run on a 0.9 % agarose gel and stained with ethidium bromide.

**Fig. S8** Agarose gel showing cleavage of 38  $\mu\text{M}$  pBR322 DNA incubated with 150  $\mu\text{M}$  of complex in 20 mM buffer (MES, MOPSO, TRIS, CHES or CAPS according to pH) at 37  $^{\circ}\text{C}$  for **1** after 0.5h incubation.

**Fig. S9** Titration condition: 50 mM Tris-HCl ( 50 Mm  $\text{NaClO}_4$  )at pH 7.2, [complex]=25  $\mu\text{M}$ , initial  $[\text{NaCl}] = 200 \text{ mM}$ , drop 1  $\mu\text{L}$  NaCl solution to the buffer each time (it means that the concentration of NaCl increase 50  $\mu\text{M}$ ).

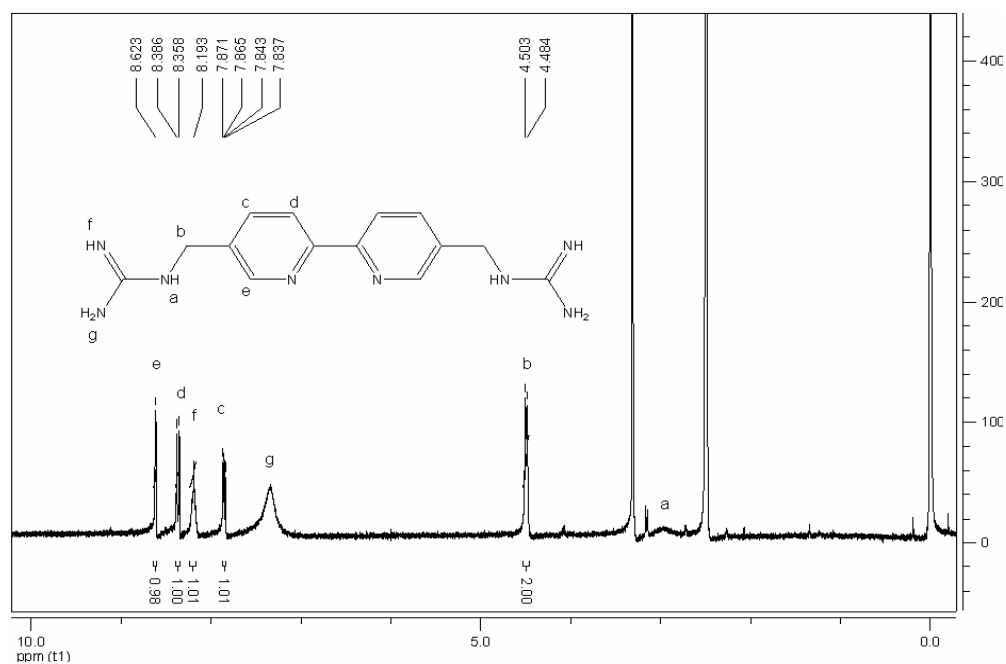

Figure S1 <sup>1</sup>H NMR spectrum of L<sup>1</sup>.

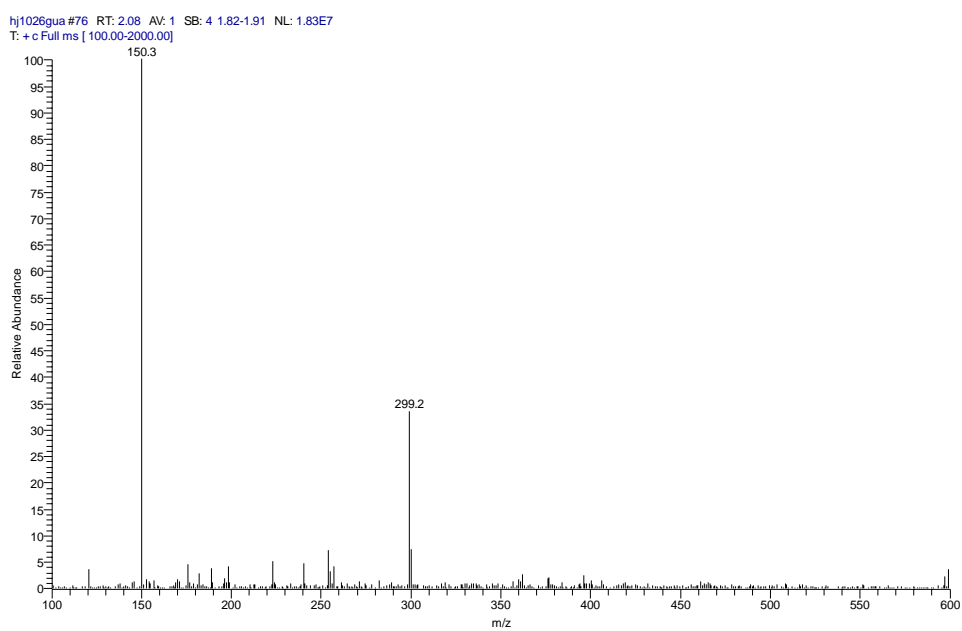

Fig. S2 ESI-MS spectrum of L<sup>1</sup>

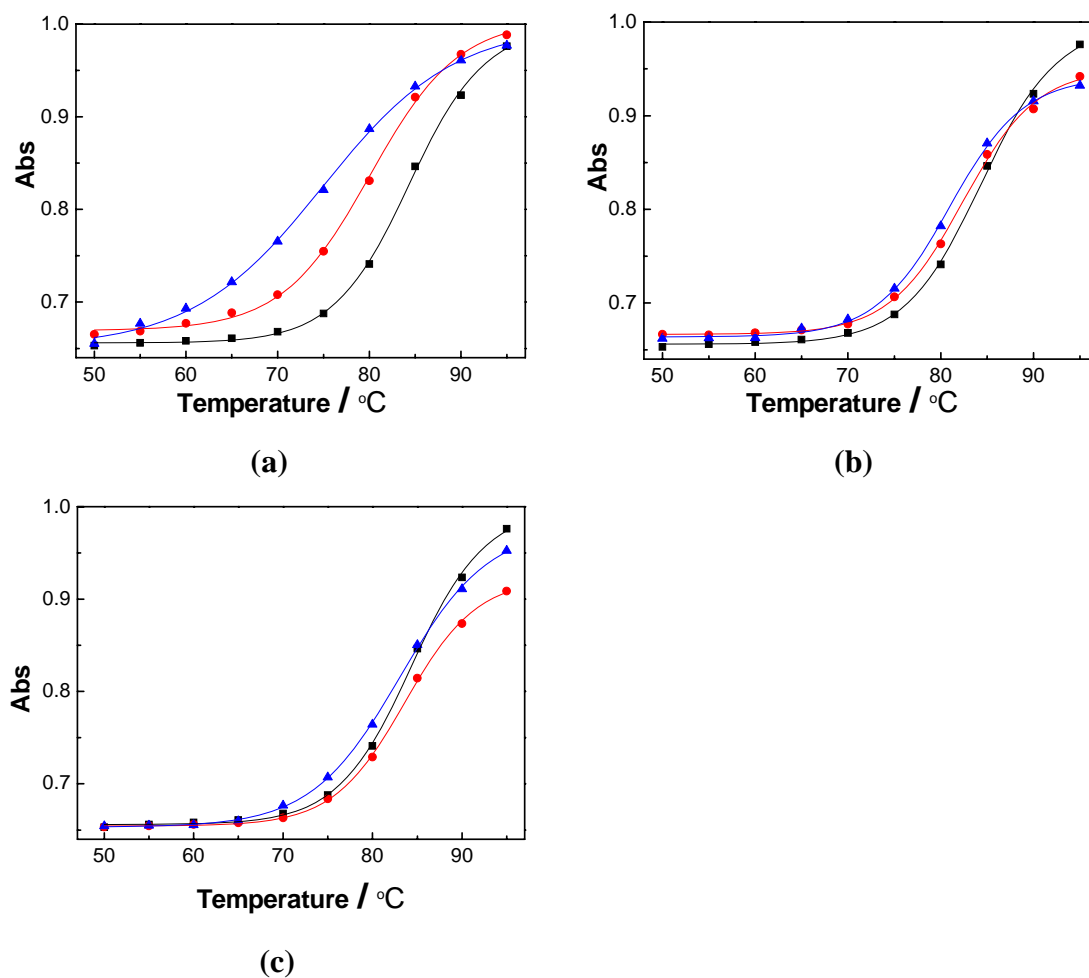

**Fig. S3**  $T_m$  curves of 100  $\mu\text{M}$  CT DNA in 20 mM pH 8.0 HEPES buffer, 0.1 M  $\text{NaClO}_4$ , in each graph containing no Cu complex(■), 10  $\mu\text{M}$  of **1** (a), **2** (b) and **3** (c) (●), 20  $\mu\text{M}$  of **1** (a), **2** (b) and **3** (c) (▲).

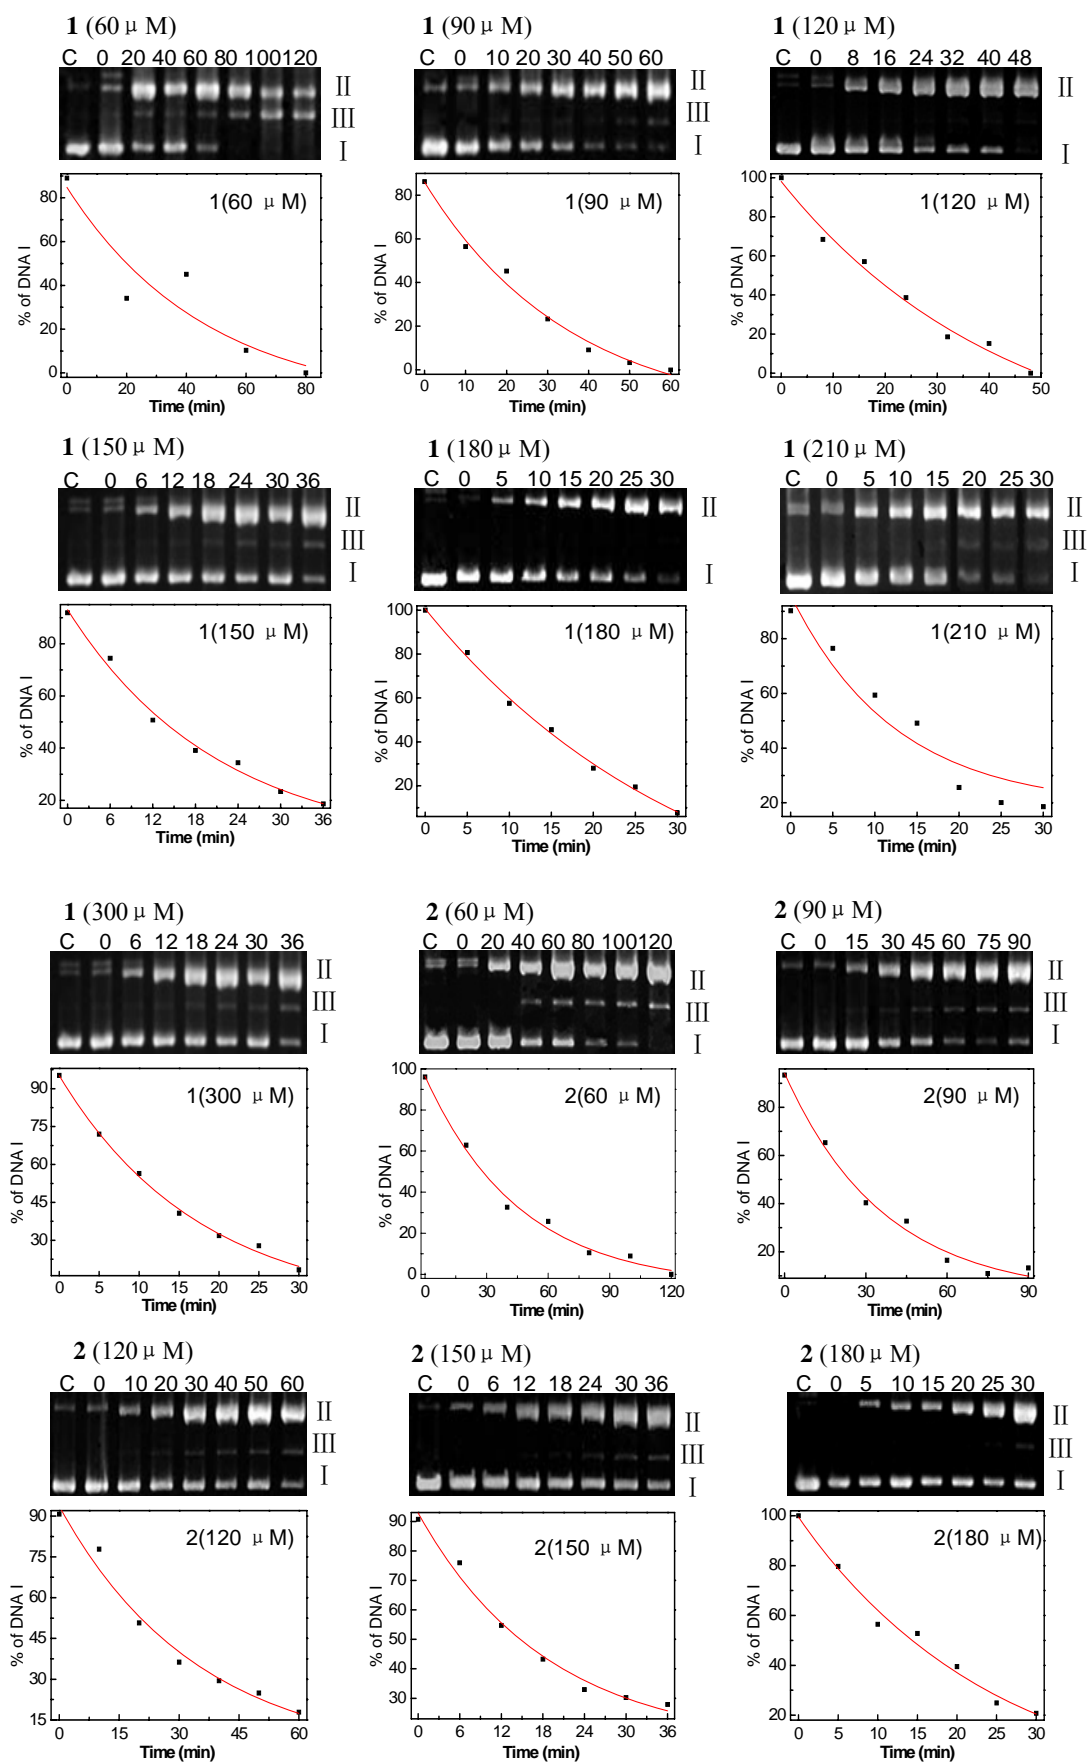

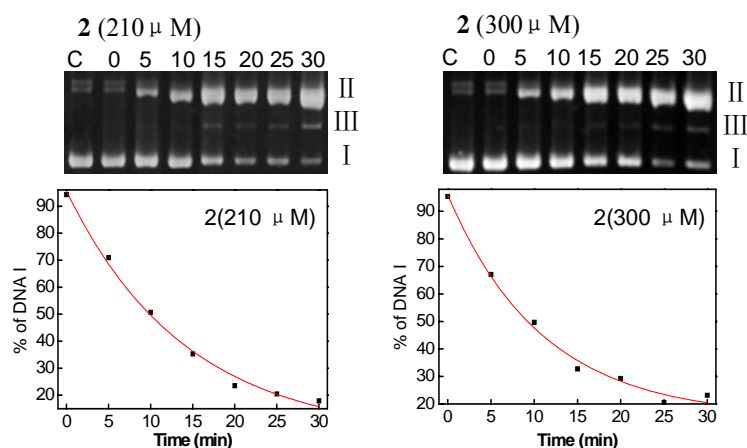

**Fig. S4** Agarose gel electrophoresis (a) and corresponding time course plots (b) showing cleavage of pBR322 DNA by complex **1** and **2** (60-300  $\mu\text{M}$ ) in 20 mM pH 7.2 HEPES buffer at 37  $^{\circ}\text{C}$ . In plans, lane C means DNA control, in graphs, symbol ■ indicates the experimental data for the SC forms. The lines connecting them are single exponential fits.

**Table S1**  $k_{\text{obs}}$  for the cleavage of pBR322 DNA by different concentrations of complexes.

| Concentration of complex / $\mu\text{M}$ | $k_{\text{obs}}$ of <b>1</b> / $\text{h}^{-1}$ ( $R^2$ ) | $k_{\text{obs}}$ of <b>2</b> / $\text{h}^{-1}$ ( $R^2$ ) |
|------------------------------------------|----------------------------------------------------------|----------------------------------------------------------|
| 60                                       | 1.91 (0.876)                                             | 1.49 (0.992)                                             |
| 90                                       | 2.37 (0.989)                                             | 1.86 (0.981)                                             |
| 120                                      | 2.73 (0.963)                                             | 2.24 (0.968)                                             |
| 150                                      | 3.06 (0.997)                                             | 2.53 (0.994)                                             |
| 180                                      | 3.21 (0.972)                                             | 2.60 (0.935)                                             |
| 210                                      | 3.32 (0.925)                                             | 2.81 (0.956)                                             |
| 300                                      | 3.41 (0.996)                                             | 3.07 (0.977)                                             |

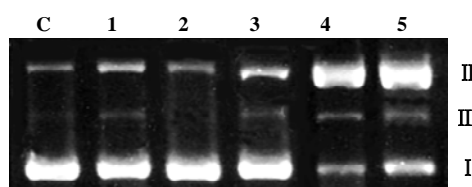

**Fig. S5** Agarose gel showing cleavage of 38  $\mu\text{M}$  pBR322 DNA incubated with 150  $\mu\text{M}$  of compounds in 20 mM HEPES buffer, pH 7.2 at 37  $^{\circ}\text{C}$  for 1h. Lane C: DNA control, Lane 1: DNA +  $L^1$ , Lane 2: DNA +  $L^2$ , Lane 3: DNA +  $\text{Cu}(\text{ClO}_4)_2$ , Lane 4: DNA + **1**, Lane 5: DNA + **2**.

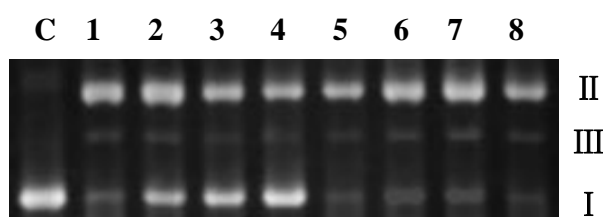

**Fig. S6** Agarose gel showing cleavage of 38  $\mu\text{M}$  pBR322 DNA incubated with 150  $\mu\text{M}$  of complex in 20 mM HEPES, pH 7.2 at 37  $^{\circ}\text{C}$  for 1h for **1** and **2**. Lane C: DNA control, Lane 1: DNA + **1**, Lanes 2-4: DNA + **1** +100U/mL, 500U/mL, 1,000U/mL Catalase, Lane 5: DNA + **2**, Lanes 6-8: DNA + **2** +100U/mL, 500U/mL, 1,000U/mL Catalase.

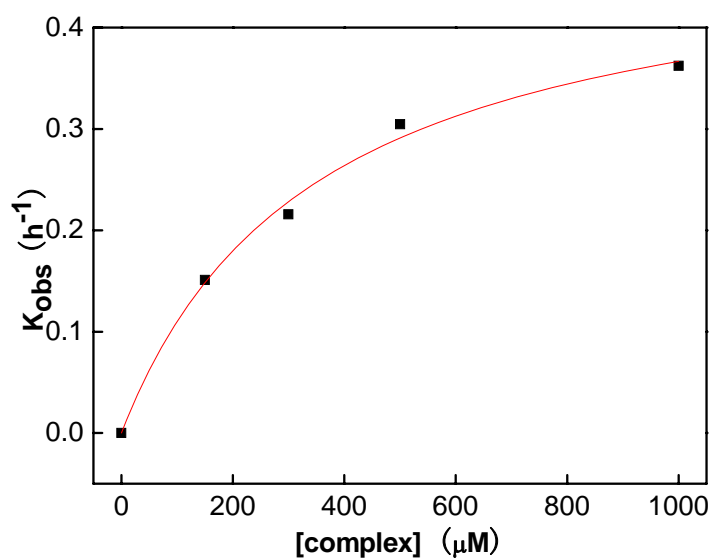

**Fig. S7** Kinetics for the cleavage of plasmid pBR322 DNA by **3** (150, 300, 500, 1000  $\mu\text{M}$ ) in 20 mM HEPES, pH 7.2 at 37  $^{\circ}\text{C}$ . The samples were run on a 0.9 % agarose gel and stained with ethidium bromide.

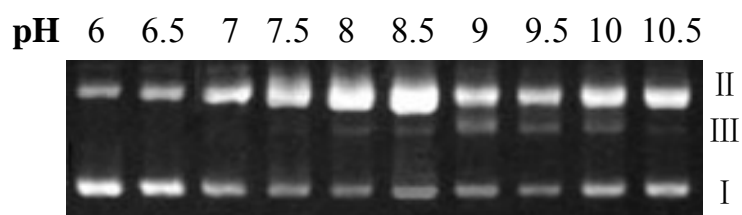

**Fig. S8** Agarose gel showing cleavage of 38  $\mu\text{M}$  pBR322 DNA incubated with 150  $\mu\text{M}$  of **1** in 20 mM buffer (MES, MOPSO, TRIS, CHES or CAPS according to pH) at 37  $^{\circ}\text{C}$  after 0.5h incubation.

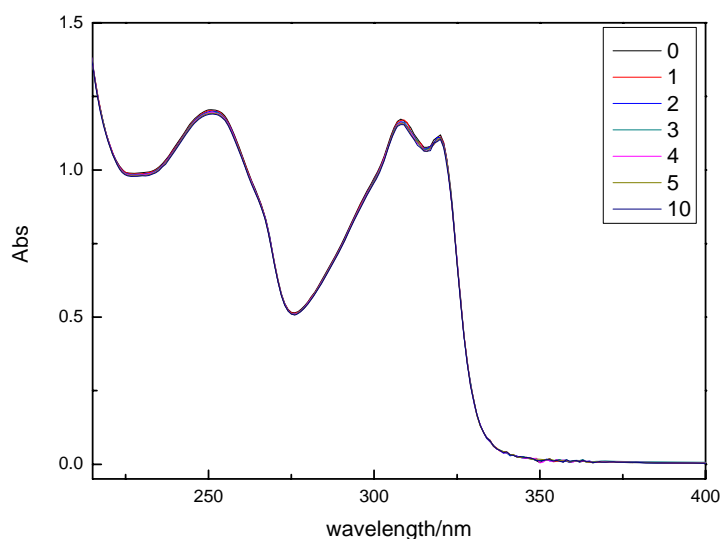

**Fig. S9** Titration condition: 50 mM Tris-HCl ( 50 Mm  $\text{NaClO}_4$  )at pH 7.2, [complex]=25  $\mu\text{M}$ , initial [NaCl] = 200 mM, drop 1  $\mu\text{L}$  NaCl solution to the buffer each time (it means that the concentration of NaCl increase 50  $\mu\text{M}$ ).
